# Supplementary material
Source: ML conference proceedings conference paper supplement (https://openaccess.thecvf.com/content/WACV2025/html/Takezaki_Self-Relaxed_Joint_Training_WACV_2025_paper.html)
Supplement: Supplementary file 1 [file Takezaki_Self-Relaxed_Joint_Training_WACV_2025_supplemental.pdf]

# Self-Relaxed Joint Training: Sample Selection for Severity Estimation with Ordinal Noisy Labels –Supplementary Materials–

---

**Algorithm 2** Proposed framework with JoCor [34]

---

1: **Input:** Dataset  $\tilde{\mathcal{D}}$ , two networks  $f_1$  and  $f_2$  with initial weights  $\theta_1$  and  $\theta_2$ , learning rate  $\eta$ , noise rate  $\epsilon$ , epoch  $T'$  and  $T_{\max}$ , iteration  $t_{\max}$ , temperature  $\tau$ ;  
**for**  $T = 1, 2, \dots, T_{\max}$  **do**  
    2: **Shuffle** training set  $\tilde{\mathcal{D}}$ ;  
    **for**  $t = 1, \dots, t_{\max}$  **do**  
        3: **Fetch** mini-batch  $\tilde{\mathcal{B}}$  from  $\tilde{\mathcal{D}}$ ;  
        4: **Select** clean samples from  $\tilde{\mathcal{B}}$  by  $\mathcal{L}_h^{\text{JoCor}}$  (with  $\tau$ );  
         $\mathcal{B} \leftarrow \arg \min_{\mathcal{B}': |\mathcal{B}'| \geq R(T)|\tilde{\mathcal{B}}|} \mathcal{L}_h^{\text{JoCor}}(f_1, f_2, \mathcal{B}')$ ;  
        5: **Derive** soft labels  $l_s$  from  $l_h$  for  $\mathcal{B}_1, \mathcal{B}_2$  by Eq.(3);  
        6: **Update** networks;  
         $\theta_1 \leftarrow \theta_1 - \eta \nabla \mathcal{L}_s^{\text{JoCor}}(f_1, f_2, \mathcal{B})$ ;  
         $\theta_2 \leftarrow \theta_2 - \eta \nabla \mathcal{L}_s^{\text{JoCor}}(f_1, f_2, \mathcal{B})$ ;  
    **end**  
    7: **Update**  $R(T) \leftarrow 1 - \min \left\{ \frac{T}{T'} \epsilon, \epsilon \right\}$ ;  
**end**  
8: **Output:** two trained networks with  $\theta_1$  and  $\theta_2$ .

---

## A. Applying our framework to other joint-training methods

In our paper, we detailed Algorithm 1, where our framework is applied to Co-teaching [8]. However, our framework is versatile and can be applicable to other joint-training methods, such as JoCor [34] and CoDis [36]. Algorithms 2 and 3 show the entire training procedure of “JoCor + Ours” and “CoDis + Ours,” respectively.

Algorithm 2 of “JoCor + Ours” has a very similar structure as Algorithm 1; however, its loss functions  $\mathcal{L}_h^{\text{JoCor}}$  and  $\mathcal{L}_s^{\text{JoCor}}$  are different from  $\mathcal{L}_h$  and  $\mathcal{L}_s$ , respectively. JoCor [34] uses the common clean sample set  $\mathcal{B}$  for the two networks and introduces co-regularization to reduce divergence between the networks. Consequently,  $\mathcal{L}_h^{\text{JoCor}}$  becomes:

$$\mathcal{L}_h^{\text{JoCor}}(f_1, f_2, \tilde{\mathcal{B}}) = (\mathcal{L}_h(f_1, \tilde{\mathcal{B}}) + \mathcal{L}_h(f_2, \tilde{\mathcal{B}})) + \lambda \mathcal{L}_{\text{reg}}(f_1, f_2, \tilde{\mathcal{B}}), \quad (6)$$

---

**Algorithm 3** Proposed framework with CoDis [36]

---

1: **Input:** Dataset  $\tilde{\mathcal{D}}$ , two networks  $f_1$  and  $f_2$  with initial weights  $\theta_1$  and  $\theta_2$ , learning rate  $\eta$ , noise rate  $\epsilon$ , epoch  $T'$  and  $T_{\max}$ , iteration  $t_{\max}$ , temperature  $\tau$ ;  
**for**  $T = 1, 2, \dots, T_{\max}$  **do**  
    2: **Shuffle** training set  $\tilde{\mathcal{D}}$ ;  
    **for**  $t = 1, \dots, t_{\max}$  **do**  
        3: **Fetch** mini-batch  $\tilde{\mathcal{B}}$  from  $\tilde{\mathcal{D}}$ ;  
        4: **Select** clean samples from  $\tilde{\mathcal{B}}$  by  $\mathcal{L}_h^{\text{CoDis}}$  (with  $\tau$ );  
         $\mathcal{B}_1 \leftarrow \arg \min_{\mathcal{B}': |\mathcal{B}'| \geq R(T)|\tilde{\mathcal{B}}|} \mathcal{L}_h^{\text{CoDis}}(f_1, f_2, \mathcal{B}')$ ;  
         $\mathcal{B}_2 \leftarrow \arg \min_{\mathcal{B}': |\mathcal{B}'| \geq R(T)|\tilde{\mathcal{B}}|} \mathcal{L}_h^{\text{CoDis}}(f_2, f_1, \mathcal{B}')$ ;  
        5: **Derive** soft labels  $l_s$  from  $l_h$  for  $\mathcal{B}_1, \mathcal{B}_2$  by Eq.(3);  
        6: **Update** networks;  
         $\theta_1 \leftarrow \theta_1 - \eta \nabla \mathcal{L}_s(f_1, \mathcal{B}_2)$ ;  
         $\theta_2 \leftarrow \theta_2 - \eta \nabla \mathcal{L}_s(f_2, \mathcal{B}_1)$ ;  
    **end**  
    7: **Update**  $R(T) \leftarrow 1 - \min \left\{ \frac{T}{T'} \epsilon, \epsilon \right\}$ ;  
**end**  
8: **Output:** two trained networks with  $\theta_1$  and  $\theta_2$ .

---

where  $\mathcal{L}_{\text{reg}}$  is a regularization term:

$$\mathcal{L}_{\text{reg}}(f_1, f_2, \tilde{\mathcal{B}}) = \sum_{\{\mathbf{x}_i, \tilde{y}_i\} \in \tilde{\mathcal{B}}} J(\mathbf{p}_1(\mathbf{x}_i), \mathbf{p}_2(\mathbf{x}_i)), \quad (7)$$

and  $J(\cdot, \cdot)$  denotes the Jeffrey divergence (i.e., the symmetrized Kullback-Leibler (KL) divergence). For updating the models with soft labels, “JoCor+Ours” uses the loss function  $\mathcal{L}_s^{\text{JoCor}}$  obtained by replacing  $\mathcal{L}_h$  with  $\mathcal{L}_s$  in Eq. (6).

Algorithm 3 of “CoDis + Ours” has a more elaborated structure than Algorithm 1; CoDis [36] uses possibly clean samples that have high discrepancy prediction probabilities between two networks,  $f_1$  and  $f_2$ . The proposed framework with CoDis selects small loss samples with the loss

Table 7. Classification results on LIMUC with Truncated-Gaussian noise. Following tradition, the test accuracy (Acc.), mean absolute error (MAE), and macro F1 (mF1) are averaged over the last ten epochs. The mean and standard deviations of five-fold cross-validation are shown. The best and second-best results are highlighted in red and blue, respectively. For plugin settings, improved results are shown by bold.

| Method             | Noise rate: $\epsilon = 0.2$ |                    |                    | Noise rate: $\epsilon = 0.4$ |                    |                    |
|--------------------|------------------------------|--------------------|--------------------|------------------------------|--------------------|--------------------|
|                    | Acc.↑                        | MAE↓               | mF1↑               | Acc.↑                        | MAE↓               | mF1↑               |
| Standard           | 0.665±0.010                  | 0.373±0.007        | 0.573±0.007        | 0.566±0.018                  | 0.489±0.018        | 0.479±0.011        |
| Sord [5]           | 0.708±0.009                  | 0.309±0.010        | 0.632±0.015        | 0.632±0.016                  | 0.389±0.019        | 0.564±0.024        |
| Label-smooth [23]  | 0.690±0.010                  | 0.339±0.010        | 0.601±0.016        | 0.609±0.016                  | 0.432±0.017        | 0.511±0.007        |
| F-correction [25]  | 0.670±0.009                  | 0.362±0.010        | 0.585±0.010        | 0.609±0.008                  | 0.430±0.008        | 0.529±0.010        |
| Reweight [18]      | 0.667±0.006                  | 0.371±0.008        | 0.573±0.013        | 0.575±0.008                  | 0.477±0.008        | 0.494±0.013        |
| Mixup [9]          | 0.676±0.008                  | 0.359±0.005        | 0.583±0.011        | 0.605±0.012                  | 0.449±0.015        | 0.490±0.013        |
| CDR [38]           | 0.674±0.012                  | 0.362±0.007        | 0.582±0.016        | 0.571±0.027                  | 0.482±0.027        | 0.481±0.015        |
| Garg [7]           | 0.657±0.054                  | 0.433±0.146        | 0.447±0.128        | 0.525±0.040                  | 0.786±0.121        | 0.267±0.015        |
| Co-teaching [8]    | 0.698±0.002                  | 0.332±0.004        | 0.610±0.012        | 0.646±0.020                  | 0.393±0.023        | 0.544±0.023        |
| Co-teaching + Ours | <b>0.731±0.005</b>           | <b>0.289±0.005</b> | <b>0.646±0.014</b> | <b>0.677±0.019</b>           | <b>0.356±0.019</b> | <b>0.545±0.011</b> |
| JoCor [34]         | 0.720±0.006                  | 0.306±0.006        | 0.633±0.008        | 0.690±0.015                  | 0.345±0.017        | 0.573±0.007        |
| JoCor + Ours       | <b>0.731±0.009</b>           | <b>0.287±0.010</b> | <b>0.642±0.018</b> | 0.678±0.016                  | 0.353±0.017        | 0.549±0.009        |
| CoDis [36]         | 0.694±0.004                  | 0.336±0.005        | 0.609±0.013        | 0.622±0.012                  | 0.418±0.013        | 0.530±0.014        |
| CoDis + Ours       | <b>0.723±0.005</b>           | <b>0.294±0.006</b> | <b>0.639±0.017</b> | <b>0.684±0.012</b>           | <b>0.342±0.015</b> | <b>0.581±0.028</b> |

Table 8. Results of LIMUC dataset with Truncated-Gaussian noise under different loss usages for sample selection and updating. The best and second-best results are highlighted in red and blue, respectively.

| Selection | Updating | Noise rate: $\epsilon = 0.2$ |                    |                    | Noise rate: $\epsilon = 0.4$ |                    |                    |
|-----------|----------|------------------------------|--------------------|--------------------|------------------------------|--------------------|--------------------|
|           |          | Acc.↑                        | MAE↓               | mF1↑               | Acc.↑                        | MAE↓               | mF1↑               |
| hard      | hard     | 0.698±0.002                  | 0.332±0.004        | 0.610±0.012        | 0.646±0.020                  | 0.393±0.023        | 0.544±0.023        |
| soft      | soft     | 0.722±0.006                  | 0.300±0.008        | 0.628±0.019        | 0.661±0.021                  | 0.382±0.024        | 0.489±0.021        |
| hard      | soft     | <b>0.731±0.005</b>           | <b>0.289±0.005</b> | <b>0.646±0.014</b> | <b>0.677±0.019</b>           | <b>0.356±0.019</b> | <b>0.545±0.011</b> |

Table 9. Results of private UC dataset with Truncated-Gaussian noise under different loss usages for sample selection and updating.

| Selection | Updating | Noise rate: $\epsilon = 0.2$ |                    |                    | Noise rate: $\epsilon = 0.4$ |                    |                    |
|-----------|----------|------------------------------|--------------------|--------------------|------------------------------|--------------------|--------------------|
|           |          | Acc.↑                        | MAE↓               | mF1↑               | Acc.↑                        | MAE↓               | mF1↑               |
| hard      | hard     | 0.788±0.009                  | 0.236±0.008        | 0.599±0.031        | 0.702±0.022                  | 0.328±0.020        | 0.490±0.036        |
| soft      | soft     | 0.809±0.007                  | 0.209±0.006        | 0.611±0.028        | 0.721±0.030                  | 0.318±0.030        | 0.442±0.038        |
| hard      | soft     | <b>0.815±0.010</b>           | <b>0.202±0.008</b> | <b>0.621±0.035</b> | <b>0.748±0.031</b>           | <b>0.282±0.033</b> | <b>0.491±0.032</b> |

function:

$$\mathcal{L}_h^{\text{CoDis}}(f_1, f_2, \tilde{\mathcal{B}}) = \mathcal{L}_h(f_1, \tilde{\mathcal{B}}) - \lambda \mathcal{L}_{\text{reg}}(f_1, f_2, \tilde{\mathcal{B}}). \quad (8)$$

For updating the models with soft labels, “CoDis + Ours” uses the loss function  $\mathcal{L}_s$ .

## B. Experimental evaluations under the Truncated-Gaussian noise

Table 7 shows the results on LIMUC [26] under the Truncated-Gaussian noise, simulating the case that ex-

perts make the mis-labelings between the neighboring labels. (Specifically, the  $i, j$ th element of the label transition matrix,  $P_{ij}$ , takes  $1 - \rho$  for  $|i - j| = 1$  and  $P_{ij} = 0$  for  $|i - j| > 1$ .) Our methods (“\* + Ours”) outperform the others. Compared to the results under the Quasi-Gaussian noise, the individual accuracies in Table 7 are slightly lower, which is the same trend seen in the results on our private dataset in Section 4.2.

Tables 8 and 9 show how the combination of  $\mathcal{L}_h$  and  $\mathcal{L}_s$  is appropriate for learning with ordinal noisy labels un-

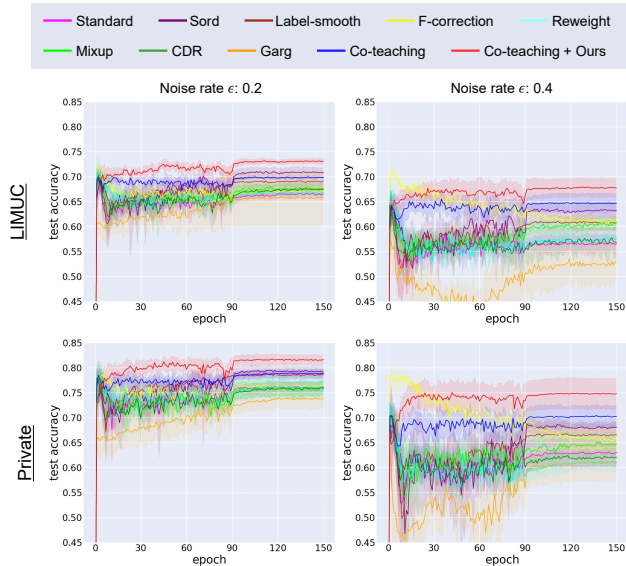

Figure 4. Test accuracy curves. The width of the shading indicates the standard deviation in cross-validation.

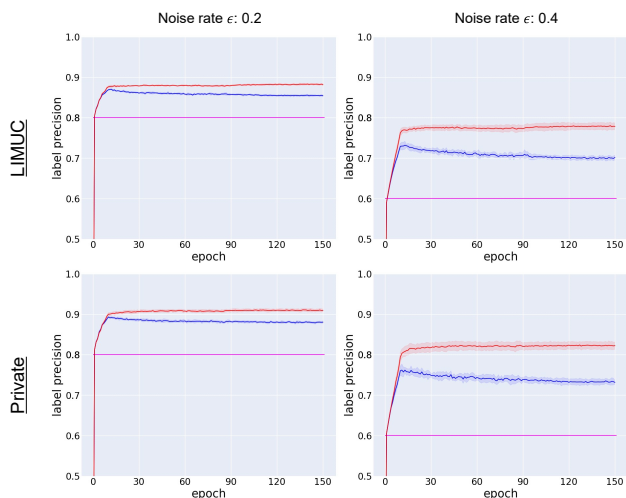

Figure 5. Label precision curves. The blue and red curves show the label precisions by “Co-teaching” and “Co-teaching + Ours,” respectively. The pink horizontal line shows  $(1 - \epsilon)$ .

der Truncated-Gaussian. These tables show the results for LIMUC and the private dataset, respectively. The tendency of the results is almost the same as those under the Quasi-Gaussian noise, shown in Tables 4 and 5.

Fig. 4 shows the test accuracy curves for the individual methods on two UC datasets with Truncated-Gaussian noise. The comparative methods show a sharp increase in their test accuracy in early epochs. Then, the comparative models often start “memorizing” the samples with incorrect labels. Our method (“Co-teaching + Ours”) could avoid the memorization effect.

Fig. 5 shows the change in label precision on two UC datasets with Truncated-Gaussian noise. The backbone method is Co-teaching. The pink horizontal lines  $(1 - \epsilon)$  indicate the label precision under random sample selection. Our method (“Co-teaching + Ours,” the red curve) shows far better label precisions than random selection (pink line) and Co-teaching (the blue curve).

### C. Code availability

We share our codes for experiments at <https://github.com/shumpei-takezaki/Self-Relaxed-Joint-Training>.
